# Supplementary material for: Using a community-based definition of poverty for targeting poor households for premium subsidies in the context of a community health insurance in Burkina Faso
Source: Springer Nature journal article supplement (doi:10.1186/s12889-014-1335-4), 2015-02-05
Supplement: MOESM1 [file 9748496]

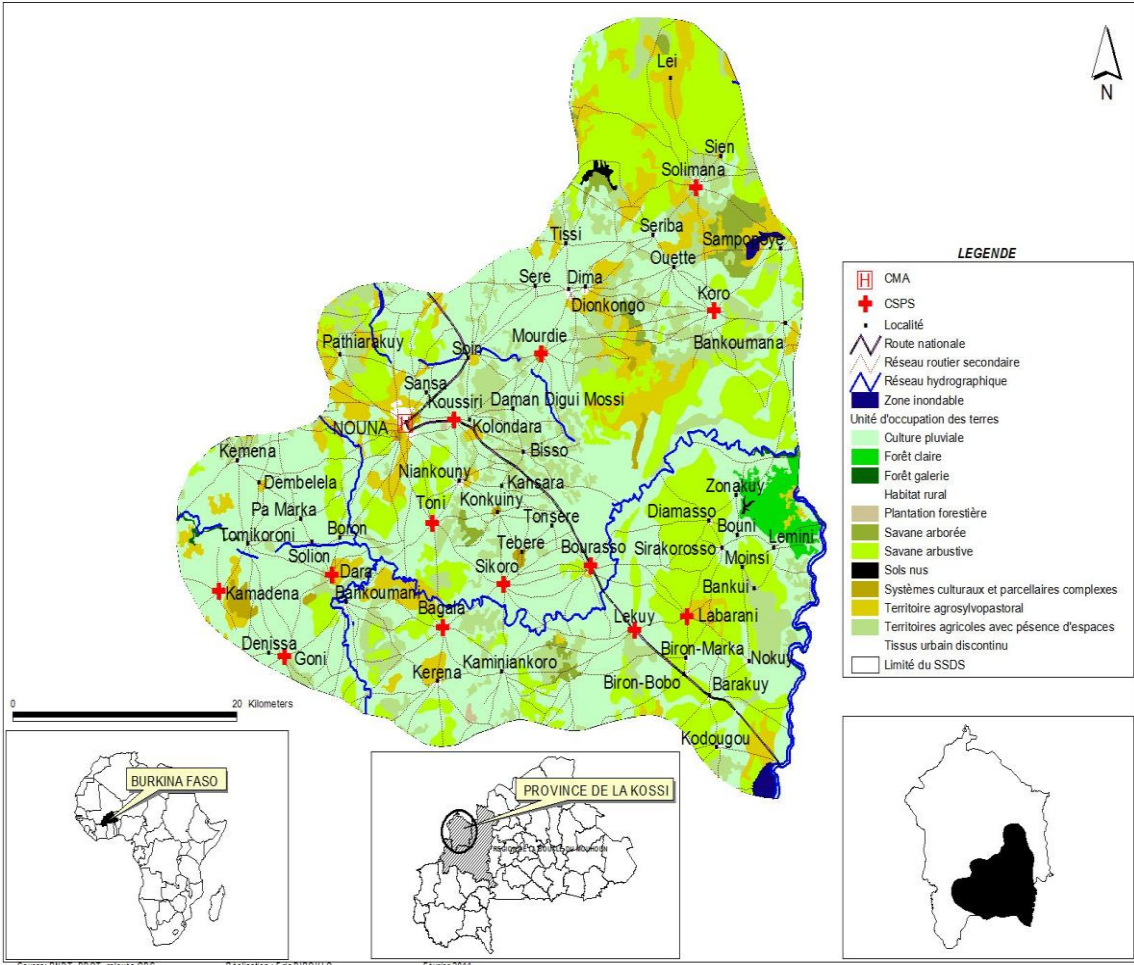

Source: BNDT, BDOT, relevés GPS

Réalisation: E. N. DIBOULO

Février 2011
